# Supplementary material
Source: Royal Society of Chemistry journal article supplement (doi:10.1039/d6nr00239k)
Supplement: d6nr00239k1.pdf [file d6nr00239k1.pdf]

## Supplementary Information

### Large-scale and facile synthesis of TiO<sub>2</sub> hollow nanocubes for self-powered ultraviolet photodetector enabling optical communication and imaging

Ziqian Ye,<sup>b</sup> Hongxu Su,<sup>a</sup> Junpei Chen,<sup>b</sup> Qiong Gao,<sup>a</sup> Lifeng Feng,<sup>\*a</sup> Mingyi Zhang,<sup>a</sup> Jinlong Bai,<sup>a</sup> Yi Zhao,<sup>a</sup> Qicheng Zhou<sup>b</sup> and Shiyong Gao<sup>\*bc</sup>

<sup>a</sup>Key Laboratory for Photonic and Electronic Bandgap Materials, Ministry of Education, School of Physics and Electronic Engineering, Harbin Normal University, Harbin 150025, China

<sup>b</sup>National Key Laboratory for Precision Hot Processing of Metals, Harbin Institute of Technology, Harbin 150001, China

<sup>c</sup>Key Laboratory of Advanced Energy Materials Chemistry, Ministry of Education, Nankai University, Tianjin 300071, China

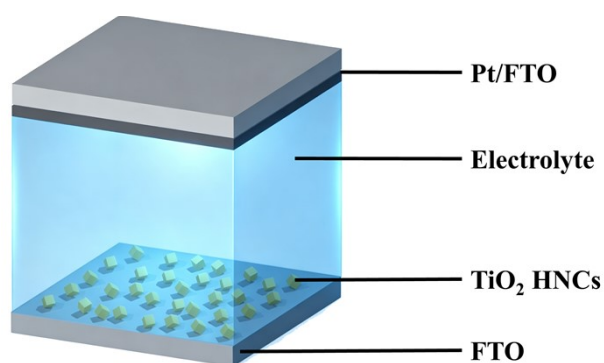

**Fig. S1** The schematic of the structure of the TiO<sub>2</sub> HNCs UVPD.

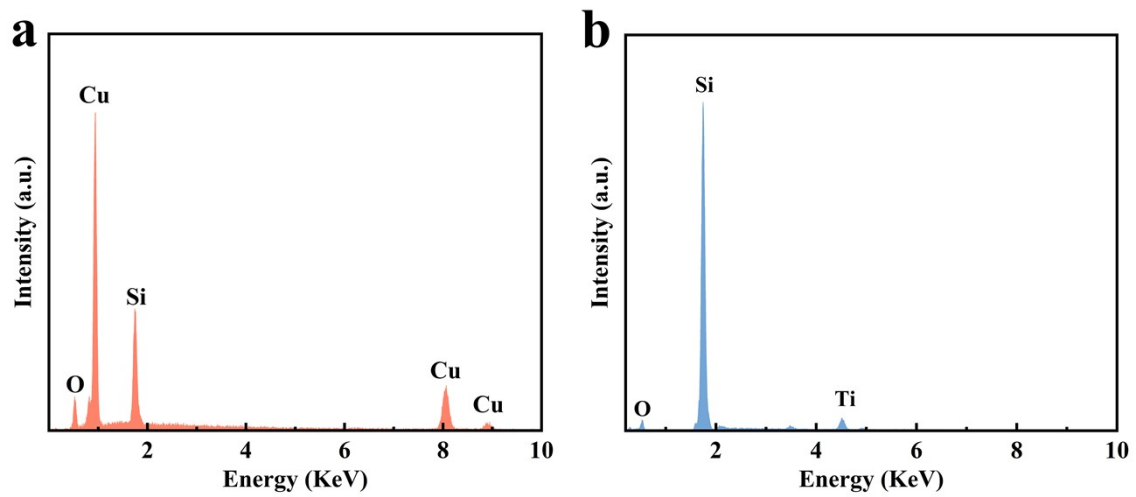

**Fig. S2** EDS spectra of  $\text{Cu}_2\text{O}$  NCs (a) and  $\text{TiO}_2$  HNCs (b).

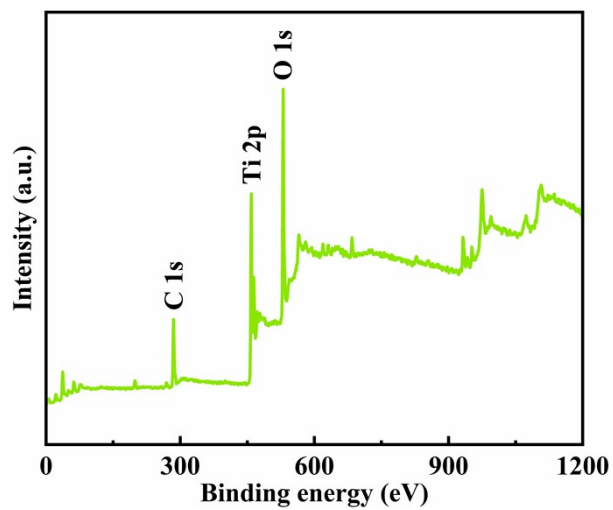

**Fig. S3** XPS survey scan of  $\text{TiO}_2$  HNCs.

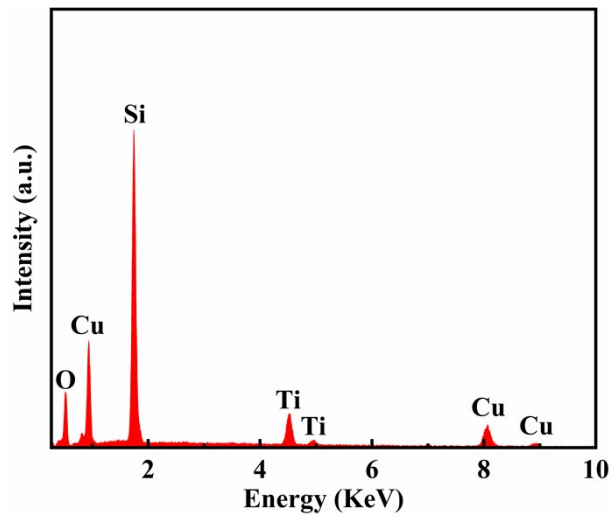

**Fig. S4** EDS spectrum of the sample obtained at 2 h LPD reaction.

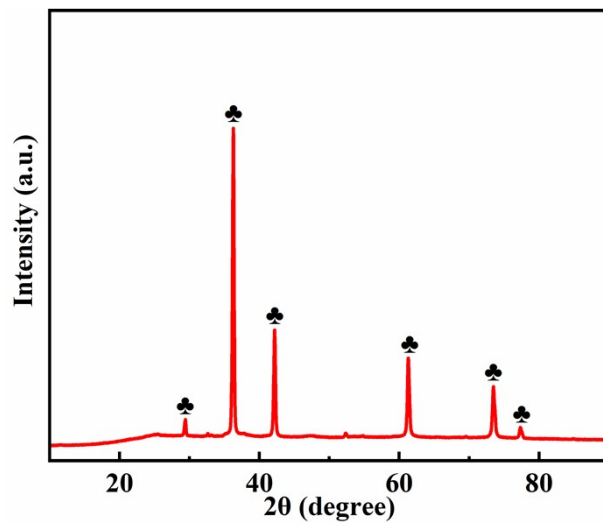

**Fig. S5** XRD pattern of the sample obtained at 2 h LPD reaction.

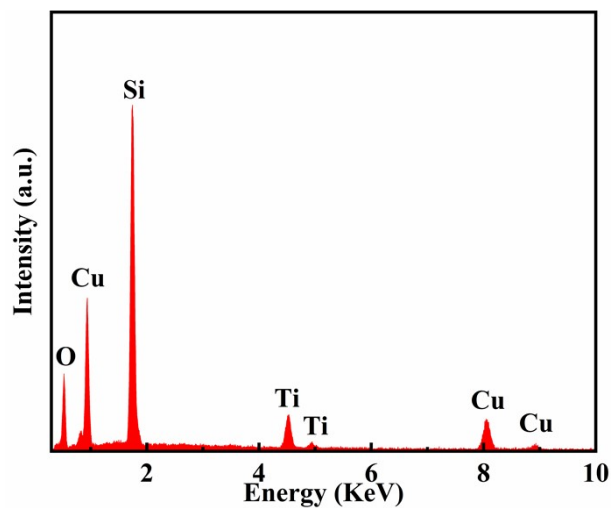

Fig. S6 EDS spectrum of the annealed sample.

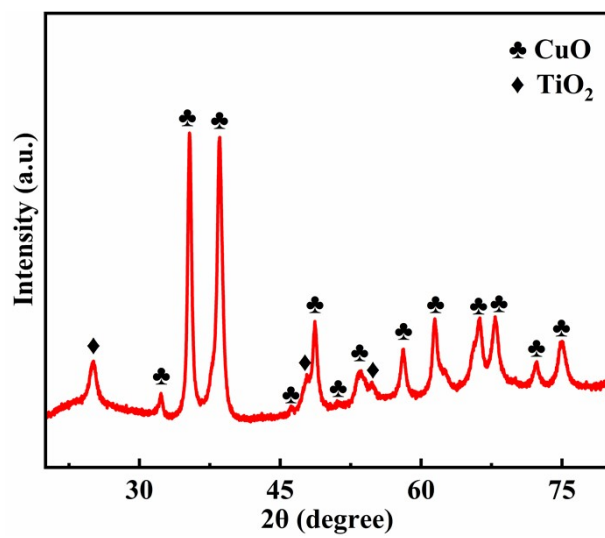

Fig. S7 XRD pattern of the annealed sample.

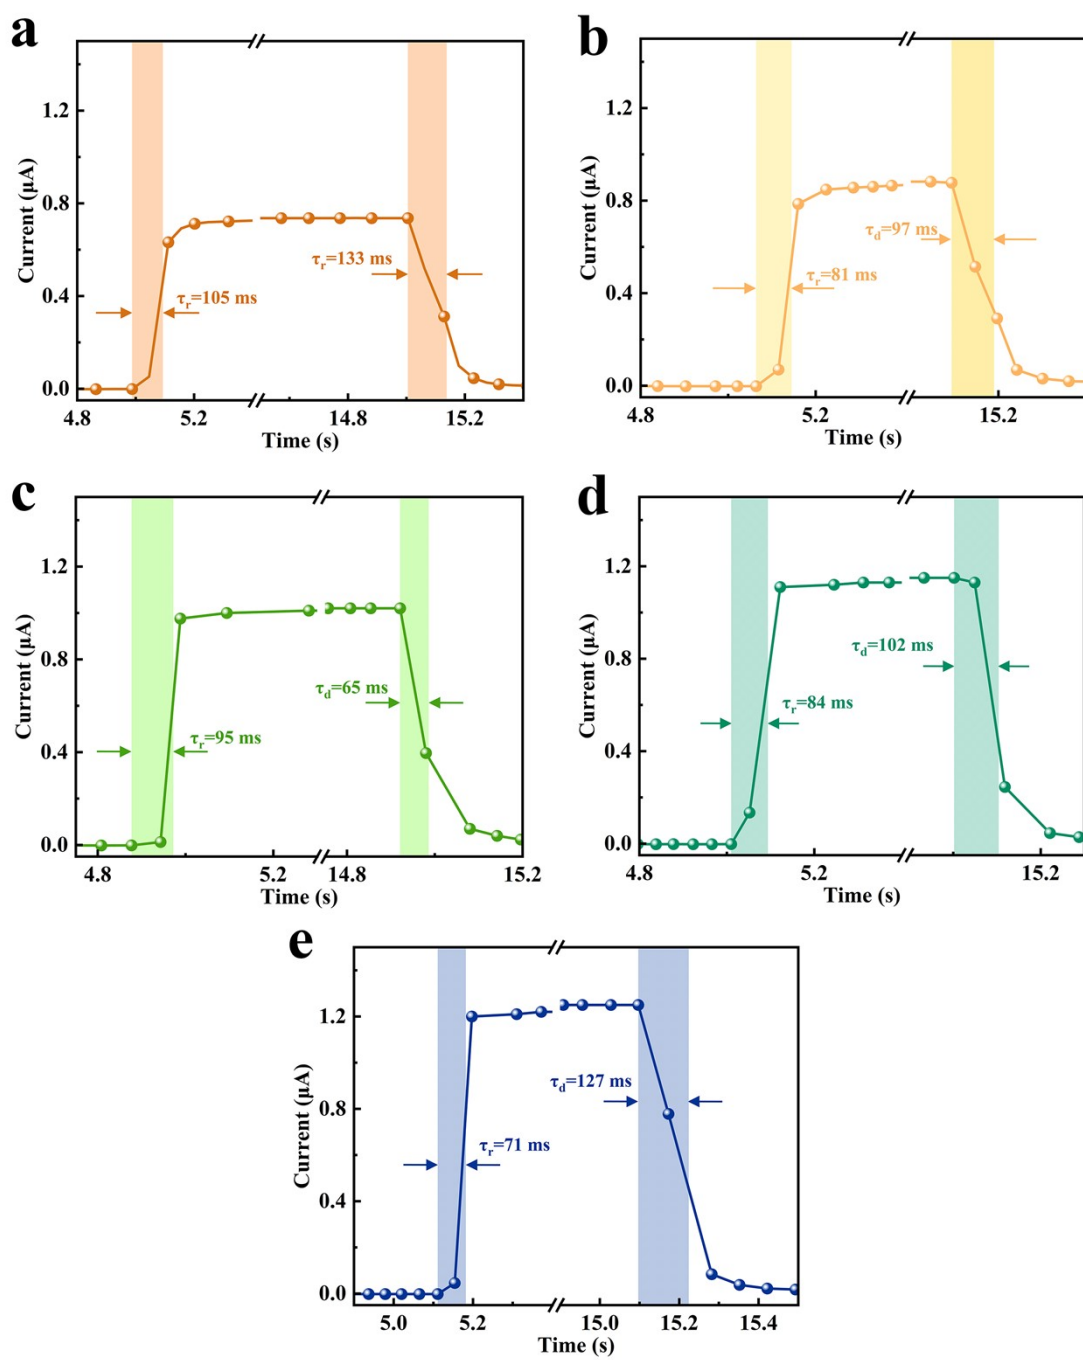

**Fig. S8** The magnified single switching cycle at UV light intensity of 25(a), 30(b), 35(c), 40(d), 45(e)  $\text{mW cm}^{-2}$ .

**Table S1** Performance comparison between TiO<sub>2</sub> HNCs UVPD and other TiO<sub>2</sub>-Based UVPDs

| Materials                                                       | Bias | Rise/decay time  | Responsivity              | Detectivity                          | Ref.             |
|-----------------------------------------------------------------|------|------------------|---------------------------|--------------------------------------|------------------|
| TiO <sub>2</sub> /PC71BM film                                   | 0 V  | 0.06 s/1 $\mu$ s | 33 mA W <sup>-1</sup>     | 1.2 $\times$ 10 <sup>14</sup> Jones  | [1]              |
| polarized<br>BaTiO <sub>3</sub> @TiO <sub>2</sub><br>nanofibers | 2 V  | 0.5 s/~          | 3.8 mA/W                  | 1.28 $\times$ 10 <sup>11</sup> Jones | [2]              |
| TiO <sub>2</sub> /CuMnO <sub>2</sub> thin<br>film               | 0 V  | 7.3/0.4 s        | ~                         | ~                                    | [3]              |
| TiO <sub>2</sub> nanowire                                       | 5 V  | ~                | 0.069 mA W <sup>-1</sup>  | ~                                    | [4]              |
| p-CuZnS/n-TiO <sub>2</sub><br>nanotube                          | 0 V  | 0.45/0.41 s      | 8.76 $\mu$ A/W            | ~                                    | [5]              |
| TiO <sub>2</sub> nanoparticles                                  | 0 V  | 0.064/0.106 s    | 4.5 mA W <sup>-1</sup>    | 3.38 $\times$ 10 <sup>11</sup> Jones | [6]              |
| Au/TiO <sub>2</sub><br>nanotube/P3HT<br>polarized               | 0 V  | 0.48/2.21 s      | 0.25 mA W <sup>-1</sup>   | 2.9 $\times$ 10 <sup>10</sup> Jones  | [7]              |
| BaTiO <sub>3</sub> @TiO <sub>2</sub><br>nanofibers              | 1    | 0.5 s/~          | 0.0256 mA W <sup>-1</sup> | 2.75 $\times$ 10 <sup>7</sup> Jones  | [8]              |
| TiO <sub>2</sub> /Ag<br>film                                    | 0    | 0.002/0.057      | 0.133                     | ~                                    | [9]              |
| TiO <sub>2</sub> /NiO<br>nanowells                              | 0    | 1.2/7.1          | 0.042                     | 1.1 $\times$ 10 <sup>9</sup>         | [10]             |
| TiO <sub>2</sub> HNCs                                           | 0 V  | 0.105/0.133 s    | 0.104mA W <sup>-1</sup>   | 9.66 $\times$ 10 <sup>10</sup> Jones | <b>This work</b> |

## References

1. T. Yan, S. Cai, Z. Hu, Z. Li and X. Fang, *Journal of Physical Chemistry Letters*, 2021, **12**, 9912-9918
2. L. Su, T. Yan, X. Liu, F. Cao, X. Fang, *Advanced Functional Materials*, 2023, **33**, 2214533.
3. C. Lazau, M. Nicolaescu, C. Orha, V. Serban and C. Bandas, *Materials*, 2022, **15**, 5229.
4. T. -Y. Tsai, S. -J. Chang, W. -Y. Weng, C. -L. Hsu, S. -H. Wang, C. -J. Chiu, T. -J. Hsueh and S. -P. Chang, *Journal of the Electrochemical Society*, 2012, **159**, J132.
5. X. Xu, J. Chen, S. Cai, Z. Long, Y. Zhang, L. Su, S. He, C. Tang, P. Liu, H. Peng and X. Fang, *Advanced Materials*, 2018, **30**, 1803165.
6. T. H. Manh, J. -S. Bae, J. Hur, *Applied Surface Science*, 2022, **604**, 154528.
7. L. Zheng, X. Deng, Y. Wang, J. Chen, X. Fang, L. Wang, X. Shi and H. Zheng, *Advanced Functional Materials*, 2020, **30**, 2001604.
8. L. Su, T. Yan, X. Liu, F. Cao and X. Fang, *Advanced. Functional. Materials*, 2023, **33**, 4533.
9. J. Xu, W. Yang, H. Chen, L. Zheng, M. Hu, Y. Li and X. Fang, *Journal of Materials Chemistry C*, 2018, **6**, 3334-3340.
10. L. Zheng, F. Teng, Z. Zhang, B. Zhao and X. Fang, *Journal of Materials Chemistry C*, 2016, **4**, 10032-10039.
